# Supplementary material for: Comparison of Nutritive Values of Tropical Pasture Species Grown in Different Environments, and Implications for Livestock Methane Production: A Meta-Analysis
Source: MDPI journal article supplement (doi:10.3390/ani12141806), 2022-07-14
Supplement: s1 [file s1]

# Comparison of Nutritive Values of Tropical Pasture Species Grown in Different Environments, and Implications for Livestock Methane Production: A Meta-Analysis

Priyanath Jayasinghe<sup>1,2,\*</sup>, Thiagarajah Ramilan<sup>1</sup>, Daniel J. Donaghy<sup>1</sup>, Keith G. Pembleton<sup>3</sup>, David G. Barber<sup>4</sup>

<sup>1</sup> School of Agriculture and Environment, Massey University, Private Bag 11 222, Palmerston North 4440, New Zealand; T.Ramilan@massey.ac.nz (R.T.); D.J.Donaghy@massey.ac.nz (D.J.D.)

<sup>2</sup> Department of Animal Science, Faculty of Animal Science and Export Agriculture, Uva Wellassa University, Badulla, 90000, Sri Lanka.

<sup>3</sup> Centre for Sustainable Agricultural Systems and School of Agriculture and Environmental Science, University of Southern Queensland, Toowoomba, QLD, 4350, Australia. Keith.Pembleton@usq.edu.au (K.G.P.)

<sup>4</sup> Agri-science Queensland, Department of Agriculture and Fisheries Queensland, University of Queensland Gatton Campus, Lawes, QLD 4343, Australia. david.barber@daf.qld.gov.au (D.G.B.)

\* Correspondence: P.Jayasinghe@massey.ac.nz (P.J.)

**Table S1:** Nutritive value (mean  $\pm$  standard deviation) of different tropical pasture species and cultivars

| Cultivar Name                            | CP               | ADF              | NDF              | OMD               | Minerals         | ME              | <sup>1</sup> CH <sub>4</sub> |
|------------------------------------------|------------------|------------------|------------------|-------------------|------------------|-----------------|------------------------------|
| <i>Andropogon gayanus</i>                | 4.91 $\pm$ 2.24  | 39.40 $\pm$ 1.41 | 72.67 $\pm$ 1.71 | -                 | -                | -               | 133.08 $\pm$ 0.05            |
| <i>Andropogon gayanus</i> cv Gamba       | 6.45 $\pm$ 1.76  | -                | -                | -                 | -                | -               | -                            |
| <i>Brachiaria brizantha</i>              | 11.17 $\pm$ 3.20 | 47.02 $\pm$ 6.34 | 66.48 $\pm$ 7.81 | -                 | 11.49 $\pm$ 1.33 | -               | 132.89 $\pm$ 0.23            |
| <i>Brachiaria brizantha</i> cv Marandu   | 12.33 $\pm$ 4.11 | 37.30 $\pm$ 1.76 | 63.80 $\pm$ 3.03 | 55.35 $\pm$ 4.59  | 13.50 $\pm$ 1.35 | 7.06 $\pm$ 0.73 | 132.81 $\pm$ 0.09            |
| <i>Brachiaria brizantha</i> cv MG4       | 12.07 $\pm$ 4.02 | 39.27 $\pm$ 3.42 | 64.80 $\pm$ 4.25 | 57.14 $\pm$ 4.76  | 11.80 $\pm$ 1.95 | 7.34 $\pm$ 0.76 | 132.84 $\pm$ 0.13            |
| <i>Brachiaria brizantha</i> cv Piatá     | 12.53 $\pm$ 4.82 | 42.27 $\pm$ 5.84 | 65.57 $\pm$ 2.98 | 57.00 $\pm$ 6.35  | 11.77 $\pm$ 1.46 | 7.32 $\pm$ 1.02 | 132.87 $\pm$ 0.09            |
| <i>Brachiaria brizantha</i> cv Xaraes    | 11.85 $\pm$ 2.98 | 38.17 $\pm$ 2.42 | 65.77 $\pm$ 1.53 | 55.38 $\pm$ 5.11  | 11.93 $\pm$ 1.15 | 7.06 $\pm$ 0.82 | 132.87 $\pm$ 0.05            |
| <i>Brachiaria</i> cv CIAT BR02 / 1752    | 7.68 $\pm$ 2.70  | 33.53 $\pm$ 2.71 | 61.03 $\pm$ 3.33 | -                 | -                | -               | 132.73 $\pm$ 0.10            |
| <i>Brachiaria</i> cv CIAT BRO2/1794      | 7.36 $\pm$ 2.49  | 33.14 $\pm$ 3.23 | 61.90 $\pm$ 3.53 | -                 | -                | -               | 132.76 $\pm$ 0.11            |
| <i>Brachiaria decumbens</i>              | 10.80            | 41.70            | 71.70            | -                 | -                | -               | 133.05                       |
| <i>Brachiaria decumbens</i> cv Basilisk  | 11.48 $\pm$ 5.10 | 41.07 $\pm$ 2.14 | 67.77 $\pm$ 3.71 | 54.61 $\pm$ 6.96  | 11.30 $\pm$ 2.50 | 6.94 $\pm$ 1.11 | 132.93 $\pm$ 0.11            |
| <i>Brachiaria humidicola</i>             | 16.47 $\pm$ 4.15 | -                | -                | 58.96 $\pm$ 3.08  | -                | 7.63 $\pm$ 0.49 | -                            |
| <i>Brachiaria humidicola</i> cv Llanero  | 12.55 $\pm$ 4.41 | 40.60 $\pm$ 0.20 | 67.23 $\pm$ 1.27 | 56.97 $\pm$ 5.43  | 11.60 $\pm$ 0.62 | 7.31 $\pm$ 0.87 | 132.92 $\pm$ 0.04            |
| <i>Brachiaria hybrid</i> cv Mavuno       | 11.00 $\pm$ 1.41 | -                | 61.50 $\pm$ 2.12 | 64.75 $\pm$ 2.47  | -                | 8.56 $\pm$ 0.40 | 132.75 $\pm$ 0.06            |
| <i>Brachiaria hybrid</i> cv Mulato       | 14.43 $\pm$ 2.61 | -                | -                | 60.63 $\pm$ 4.51  | -                | 7.90 $\pm$ 0.72 | -                            |
| <i>Brachiaria hybrid</i> cv Mulato II    | 11.45 $\pm$ 3.49 | 34.76 $\pm$ 2.94 | 61.54 $\pm$ 3.92 | 61.91 $\pm$ 4.90  | 13.80 $\pm$ 2.08 | 8.11 $\pm$ 0.78 | 132.75 $\pm$ 0.12            |
| <i>Brachiaria hybrids</i>                | 11.56 $\pm$ 4.45 | 45.33 $\pm$ 4.62 | 64.61 $\pm$ 3.01 | 57.96 $\pm$ 7.79  | 8.61 $\pm$ 2.23  | 7.47 $\pm$ 1.25 | 132.84 $\pm$ 0.09            |
| <i>Brachiaria ruziziensis</i>            | 9.41 $\pm$ 1.51  | 38.70            | 67.10            | -                 | 8.4              | -               | 132.91                       |
| <i>Brachiaria ruziziensis</i> cv Kennedy | -                | -                | -                | -                 | -                | -               | -                            |
| <i>Cenchrus ciliaris</i>                 | 11.54 $\pm$ 3.02 | 35.97 $\pm$ 0.67 | 67.07 $\pm$ 1.46 | -                 | -                | -               | 132.91 $\pm$ 0.04            |
| <i>Cenchrus ciliaris</i> cv Bilocla      | 6.10 $\pm$ 2.96  | -                | -                | -                 | -                | -               | -                            |
| <i>Cenchrus ciliaris</i> cv Gayndah      | 6.1 $\pm$ 3.39   | -                | -                | -                 | -                | -               | -                            |
| <i>Chloris gayana</i> cv ex-Tozi         | 7.00 $\pm$ 2.65  | 48.10 $\pm$ 2.33 | 72.87 $\pm$ 0.81 | 44.56 $\pm$ 10.23 | 8.80 $\pm$ 0.62  | 5.33 $\pm$ 1.64 | 133.09 $\pm$ 0.02            |
| <i>Chloris gayana</i> cv Callide         | 12.53 $\pm$ 0.60 | -                | 65.73 $\pm$ 0.47 | -                 | -                | -               | -                            |
| <i>Chloris gayana</i> cv. Katambora      | 7.25 $\pm$ 4.17  | -                | -                | -                 | -                | -               | -                            |
| <i>Cynodon dactylon</i>                  | 10.86 $\pm$ 5.86 | 31.00 $\pm$ 3.17 | 70.34 $\pm$ 7.54 | 57.50 $\pm$ 2.52  | 5.92 $\pm$ 1.50  | 7.40 $\pm$ 0.40 | 133.01 $\pm$ 0.23            |
| <i>Cynodon dactylon</i> cv Jiggs         | 11.04 $\pm$ 5.30 | 33.84 $\pm$ 3.69 | 67.61 $\pm$ 5.10 | 49.25 $\pm$ 6.01  | 6.24 $\pm$ 1.91  | 6.08 $\pm$ 0.96 | 132.93 $\pm$ 0.15            |

|                                               |            |            |            |            |            |           |             |
|-----------------------------------------------|------------|------------|------------|------------|------------|-----------|-------------|
| <i>Cynodon dactylon</i> cv Russell            | 10.82±5.59 | 33.38±2.94 | 67.90±2.56 | -          | 5.88±1.10  | -         | 132.94±0.08 |
| <i>Cynodon dactylon</i> cv Tifton 85          | 14.83±3.15 | 44.50±2.55 | 74.73±4.16 | 50.72±6.05 | -          | 6.31±0.97 | 133.14±0.12 |
| <i>Cynodon dactylon</i> cv Tifton 9           | 10.02±4.53 | 35.46±2.01 | 66.10±2.43 | -          | 5.72±0.84  | -         | 132.88±0.07 |
| <i>Cynodon nlemfuensis</i>                    | -          | 32.84±1.14 | 74.20±1.46 | 54.68±2.31 | -          | 6.95±0.37 | 133.13±0.04 |
| <i>Cynodon nlemfuensis</i> cv Florona         | -          | -          | -          | 45.05±3.82 | -          | 5.41±0.61 | -           |
| <i>Eragrostis curvula</i>                     | 6.95±3.74  | -          | -          | -          | -          | -         | -           |
| <i>Hemarthria altissima</i> cv Floralta       | -          | -          | -          | 50.68±4.95 | -          | 6.31±0.79 | -           |
| <i>Imperata cylindrica</i>                    | 10.67±1.05 | -          | -          | -          | -          | -         | -           |
| <i>Panicum coloratum</i> cv Bambatsi          | 7.05±2.86  | -          | -          | -          | -          | -         | -           |
| <i>Panicum maximum</i>                        | 9.28±2.48  | 45.93±3.41 | 76.26±3.30 | 62.47±3.06 | 7.05±1.56  | 8.20±0.49 | 133.19±0.10 |
| <i>Panicum maximum</i> cv Mombosa             | 7.12±3.23  | 42.30±2.80 | 68.63±2.92 | -          | -          | -         | 132.96±0.09 |
| <i>Panicum maximum</i> cv Tanzania            | 7.13±1.13  | 40.80±1.88 | 68.73±1.46 | -          | -          | -         | 132.96±0.04 |
| <i>Paspalum atratum</i>                       | 5.60±1.37  | 38.73±1.61 | 66.56±1.87 | -          | -          | -         | -           |
| <i>Paspalum notatum</i>                       | -          | 35.48±1.32 | 74.92±0.68 | 51.92±2.22 | -          | 6.51±0.35 | 133.15±0.02 |
| <i>Paspalum notatum</i> cv Argentina          | 9.84±5.41  | 34.16±2.27 | 65.24±3.27 | -          | 6.12±1.08  | -         | 132.86±0.10 |
| <i>Paspalum notatum</i> cv Pensacola          | 9.82±4.37  | 35.66±1.76 | 67.02±2.35 | 51.80±2.02 | 5.68±0.94  | 6.49±0.32 | 132.91±0.07 |
| <i>Pennisetum purpureum</i>                   | 10.79±3.22 | 42.97±4.71 | 67.99±7.27 | 59.70±6.38 | 9.12±3.61  | 7.75±1.02 | 132.94±0.22 |
| <i>Pennisetum purpureum</i> cv 3rd generation | 16.27±1.75 | -          | -          | 65.44±1.33 | -          | 8.67±0.21 | -           |
| <i>Pennisetum purpureum</i> cv Dwarf          | 11.46±1.06 | -          | -          | -          | -          | -         | -           |
| <i>Pennisetum purpureum</i> cv ILRI 16791     | 10.23±2.07 | 38.93±2.61 | 54.70±0.10 | 63.23±3.67 | 13.17±0.78 | 8.32±0.59 | 132.54±0.00 |
| <i>Pennisetum purpureum</i> cv India          | 16.35±2.01 | -          | -          | 65.84±0.22 | -          | 8.74±0.04 | -           |
| <i>Pennisetum purpureum</i> cv King           | 10.46±2.01 | 42.42±4.05 | 70.93±5.20 | -          | -          | -         | 133.03±0.16 |
| <i>Pennisetum purpureum</i> cv Kobe           | 17.00±2.45 | -          | -          | 67.34±0.75 | -          | 8.98±0.12 | -           |
| <i>Pennisetum purpureum</i> cv Mott           | 13.83±1.64 | 36.08±2.37 | 63.36±1.97 | 67.18±4.22 | -          | 8.95±0.68 | 132.80±0.06 |
| <i>Pennisetum purpureum</i> cv NB 21          | 15.75±0.52 | -          | -          | -          | -          | -         | -           |
| <i>Pennisetum purpureum</i> cv Red            | 15.25±2.57 | -          | -          | 69.34±2.61 | -          | 9.30±0.42 | -           |
| <i>Pennisetum purpureum</i> cv Taiwan         | 15.60±2.31 | -          | -          | 66.19±0.35 | -          | 8.79±0.06 | -           |
| <i>Pennisetum purpureum</i> cv TaiwanA25      | 10.60±1.83 | -          | -          | -          | -          | -         | -           |
| <i>Pennisetum purpureum</i> cv Zanzibar       | 16.70±3.86 | -          | -          | 66.44±2.30 | -          | 8.83±0.37 | -           |

|                               |           |   |   |   |   |   |   |
|-------------------------------|-----------|---|---|---|---|---|---|
| <i>Urochloa mosambicensis</i> | 7.80±2.96 | - | - | - | - | - | - |
|-------------------------------|-----------|---|---|---|---|---|---|

(Nutrient metrics are CP = crude protein, NDF = neutral detergent fibre ADF = acid detergent fibre, OMD= organic matter digestibility, DMD = dry matter digestibility, ME = metabolisable energy , ADL = acid detergent lignin, minerals, , OM = organic matter. <sup>1</sup>methane gas production estimated using CH<sub>4</sub> (g CH<sub>4</sub> animal<sup>-1</sup> day<sup>-1</sup>) = 17.0 (±0.99) × DMI + 0.03 (±0.01) × NDF.

**Table S2:** References of the studies included in the meta-analysis.

| Reference | Country     | Climate              |
|-----------|-------------|----------------------|
| [1]       | Thailand    | Tropical/ equatorial |
| [2]       | Thailand    | Tropical/ equatorial |
| [3]       | Ethiopia    | Arid/ dry            |
| [4]       | Ghana       | Tropical/ equatorial |
| [5]       | Thailand    | Tropical/ equatorial |
| [6]       | Philippines | Tropical/ equatorial |
| [7]       | Ethiopia    | Warm temperate       |
| [8]       | USA         | Warm temperate       |
| [9]       | Ethiopia    | Tropical/ equatorial |
| [10]      | Brazil      | Arid/ dry            |
| [11]      | USA         | Warm temperate       |
| [12]      | Malaysia    | Tropical/ equatorial |
| [13]      | Vietnam     | Tropical/ equatorial |
| [14]      | Brazil      | Arid/ dry            |
| [15]      | Brazil      | Arid/ dry            |
| [16]      | Ghana       | Tropical/ equatorial |
| [17]      | Brazil      | Tropical/ equatorial |
| [18]      | Brazil      | Warm temperate       |
| [19]      | Rwanda      | Tropical/ equatorial |
| [20]      | Venezuela   | Tropical/ equatorial |
| [21]      | USA         | Warm temperate       |
| [22]      | USA         | Warm temperate       |
| [23]      | Cameroon    | Tropical/ equatorial |
| [24]      | Vietnam     | Tropical/ equatorial |
| [25]      | USA         | Warm temperate       |
| [26]      | USA         | Warm temperate       |
| [27]      | Australia   | Warm temperate       |
| [28]      | Thailand    | Tropical/ equatorial |
| [29]      | Thailand    | Tropical/ equatorial |
| [30]      | Mozambique  | Arid/ dry            |
| [31]      | Sri Lanka   | Tropical/ equatorial |
| [32]      | Brazil      | Tropical/ equatorial |
| [33]      | Kenya       | Tropical/ equatorial |
| [34]      | Kenya       | Warm temperate       |
| [35]      | Kenya       | Tropical/ equatorial |

1. Hare, M.D. Effect of cutting interval on yield and quality of two *Panicum maximum* cultivars in Thailand. *Trop. Grassl.-Forrajes Trop.* **2013**, *1*, 87-89.
2. Hare, M.D. Effect of cutting interval on yield and quality of three *brachiaria* hybrids in Thailand. *Trop. Grassl.-Forrajes Trop.* **2013**, *1*, 84-86.
3. Tessema, Z.K.; Mihret, J.; Solomon, M. Effect of defoliation frequency and cutting height on growth, dry-matter yield and nutritive value of Napier grass (*Pennisetum purpureum* (L.) Schumach). *Grass Forage Sci.* **2010**, *65*, 421-430, doi:10.1111/j.1365-2494.2010.00761.x.

4. Ansah, T. Herbage yield and chemical composition of four varieties of Napier (*Pennisetum purpureum*) grass harvested at three different days after planting. *Agr. Biol. J. N. Am.* **2010**, *1*, 923-929.
5. Lounglawan, P.; Lounglawan, W.; Suksombat, W. Effect of Cutting Interval and Cutting Height on Yield and Chemical Composition of King Napier Grass (*Pennisetum Purpureum* x *Pennisetum Americanum*). *APCBEE Procedia* **2014**, *8*, 27-31, doi:<https://doi.org/10.1016/j.apcbee.2014.01.075>.
6. Bacorro, T.J. Herbage dry matter yield, nutrient composition and in vitro gas production of mulato II and mombasa grasses at 30- and 45- day cutting intervals. *Philipp. J. Vet. Anim. Sci.* **2018**, *44*, 86-89.
7. Wassie, W.A.; Tsegay, B.A.; Wolde, A.T.; Limeneh, B.A. Evaluation of morphological characteristics, yield and nutritive value of *Brachiaria* grass ecotypes in northwestern Ethiopia. *Agric. Food Secur.* **2018**, *7*, 89, doi:10.1186/s40066-018-0239-4.
8. Johnson, C.R.; Reiling, B.A.; Misleavy, P.; Hall, M.B. Effects of nitrogen fertilization and harvest date on yield, digestibility, fiber, and protein fractions of tropical grasses. *J. Anim. Sci.* **2001**, *79*, 2439-2448, doi:10.2527/2001.7992439x.
9. Bayble, T, Melaku, S.; Prasad, N.K. Effects of cutting dates on nutritive value of Napier (*Pennisetum purpureum*) grass planted sole and in association with Desmodium (*Desmodium intortum*) or Lablab (*Lablab purpureus*). *Livest. Res. Rural. Dev.* **2007**, *19*.
10. Ribeiro Jr, G.O.; Teixeira, A.M.; Velasco, F.O.; Faria Júnior, W.G.; Pereira, L.G.R.; Chaves, A.V.; Gonçalves, L.C.; McAllister, T.A. Production, Nutritional Quality and In vitro Methane Production from *Andropogon gayanus* Grass Harvested at Different Maturities and Preserved as Hay or Silage. *Asian-Australas. J. Anim. Sci.* **2014**, *27*, 330-341, doi:10.5713/ajas.2013.13161.
11. Arthington, J.D.; Brown, W.F. Estimation of feeding value of four tropical forage species at two stages of maturity<sup>1,2</sup>. *J. Anim. Sci.* **2005**, *83*, 1726-1731, doi:10.2527/2005.8371726x.
12. Haryani, H.; Norlindawati, A.P.; Norfadzrin, F.; Aswanimiyuni, A.; Azman, A. Yield and nutritive values of six napier (*Pennisetum purpureum*) cultivars at different cutting age. *Malays. J. Vet. Res.* **2018**, *9*, 6-12.
13. Van Man, N.; Wiktorsson, H. Forage yield, nutritive value, feed intake and digestibility of three grass species as affected by harvest frequency. *Trop. Grassl.-Forrajes Trop.* **2003**, *37*, 101-110.
14. Kozloski, G.V.; Perottoni, J.; Ciocca, M.L.S.; Rocha, J.B.T.; Raiser, A.G.; Sanchez, L.M.B. Potential nutritional assessment of dwarf elephant grass (*Pennisetum purpureum* Schum. cv. Mott) by chemical composition, digestion and net portal flux of oxygen in cattle. *Anim. Feed Sci. Technol.* **2003**, *104*, 29-40, doi:[https://doi.org/10.1016/S0377-8401\(02\)00328-0](https://doi.org/10.1016/S0377-8401(02)00328-0).
15. Kozloski, G.V.; Perottoni, J.; Sanchez, L.M.B. Influence of regrowth age on the nutritive value of dwarf elephant grass hay (*Pennisetum purpureum* Schum. cv. Mott) consumed by lambs. *Anim. Feed Sci. Technol.* **2005**, *119*, 1-11, doi:<https://doi.org/10.1016/j.anifeedsci.2004.12.012>.
16. Meale, S.J.; Chaves, A.V.; Baah, J.; McAllister, T.A. Methane Production of Different Forages in In vitro Ruminal Fermentation. *Asian-Australas. J. Anim. Sci.* **2012**, *25*, 86-91, doi:10.5713/ajas.2011.11249.
17. Lima, D.M., Filho, A.L.A.; Lima, P.M. T.; Sakita, G. Z.; Dias e Silva, T. P.; McManus, C.; Abdalla, A. L.; Louvandini, H. Morphological characteristics, nutritive quality, and methane production of tropical grasses in Brazil. *Pesqui. Agropecu. Bras.* **2018**, *53*, 323-331.
18. Taffarel, L.E.; Mesquita, E.E.; Castagnara, D.D.; Galbeiro, S.; Costa, P.B.; de Oliveira, P.S.R. Tifton 85 grass responses to different nitrogen levels and cutting intervals. *Semina: Ciências Agrárias.* **2016**, *37*, 2067-2083.
19. Mutimura, M.; Cyprian, E.; Rao, I. M.; Nsahlai, I. V. Effect of cutting time on agronomic and nutritional characteristics of nine commercial cultivars of *Brachiaria* grass compared with Napier grass during establishment under semi-arid conditions in Rwanda . *Afr. J. Agric. Res.* **2017**, *12*, 2692-2703, doi:<https://doi.org/10.5897/AJAR2017.12474>.
20. González. R.; M.; Fondevila, M.; Barrios Urdaneta, A.; Newman, Y. In vitro gas production from buffel grass (*Cenchrus ciliaris* L.) fermentation in relation to the cutting interval, the level

- of nitrogen fertilisation and the season of growth. *Anim. Feed Sci. Technol.* **1998**, 72, 19-32, doi:[https://doi.org/10.1016/S0377-8401\(97\)00181-8](https://doi.org/10.1016/S0377-8401(97)00181-8).
21. Vendramini, J.M.B.; Sollenberger, L.E.; Soares, A.B.; Da Silva, W.L.; Sanchez, J.M.; Valente, A.L.; Aguiar, A.D.; Mullenix, M.K. Harvest frequency affects herbage accumulation and nutritive value of *brachiaria* grass hybrids in Florida. *Trop. Grassl.-Forrajes Trop.* **2014**, 2, 197-206, doi:10.17138/tgft(2)197-206.
  22. Inyang, U.; Vendramini, J.M.B.; Sellers, B.; Silveira, M.L.A.; Lunpha, A.; Sollenberger, L.E.; Adesogan, A.; Paiva, L.M. Harvest frequency and stubble height affect herbage accumulation, nutritive value, and persistence of 'Mulato II' *Brachiariagrass*. *Forage and Grazinglands* **2010**, 8, doi:10.1094/fg-2010-0923-01-rs.
  23. Enoh, M. B.; Kijora, C.; Peters, K. J.; Yonkeu, S. Effect of stage of harvest on DM yield, nutrient content, in vitro and in situ parameters and their relationship of native and *Brachiaria* grasses in the Adamawa Plateau of Cameroon. *Livest. Res. Rural. Dev.* **2005**, 17.
  24. McRoberts, K.C.; Parsons, D.; Ketterings, Q.M.; Hai, T.T.; Quan, N.H.; Ba, N.X.; Nicholson, C.F.; Cherney, D.J.R. Urea and composted cattle manure affect forage yield and nutritive value in sandy soils of south-central Vietnam. *Grass Forage Sci.* **2018**, 73, 132-145, doi:10.1111/gfs.12289.
  25. Dore, R.T. Comparing bermudagrass and bahiagrass cultivars at different stages of harvest for dry matter yield and nutrient content. Master of Science (MS), Louisiana State University and Agricultural and Mechanical College, USA, 2006.
  26. Siqueira da Silva, H.M.; Vendramini, J.M.B.; Leite de Oliveira, F.C.; Soares Filho, C.V.; Kaneko, M.; Silveira, M.L.; Dalmazo Sanchez, J.M.; Yarborough, J.K. Harvest frequency effects on herbage characteristics of 'Mavuno' *brachiariagrass*. *Crop Sci.* **2020**, 60, 1113-1122, doi:<https://doi.org/10.1002/csc2.20046>.
  27. Ehrlich, W.; Cowan, R.; Lowe, K. Managing rhodes grass (*Chloris gayana*) cv. Callide to improve diet quality. 1. Effects of age of regrowth, strip grazing and mulching. *Trop. Grassl.-Forrajes Trop.* **2003**, 37, 33-44.
  28. Tudsri, S.; Ishii, Y.; Numaguchi, H.; Prasanpanich, S. The effect of cutting interval on the growth of *Leucaena leucocephala* and three associated grasses in Thailand. *Trop. Grassl.-Forrajes Trop.* **2002**, 36, 90-96.
  29. Hare, M.; Saengkham, M.; Kaewkunya, C.; Tudsri, S.; Suriyajantratong, W.; Thummasaeng, K.; Wongpichet, K. Effect of cutting on yield and quality of *Paspalum atratum* in Thailand. *Trop. Grassl.-Forrajes Trop.* **2001**, 35, 144-150.
  30. Muir, J.; Abrao, L. Agronomic evaluation of 10 cultivated grasses in semi-arid Mozambique. *Trop. Grassl.-Forrajes Trop.* **1999**, 33, 34-39.
  31. Premarathne, S. Effect of Frequency of cutting on yeild and chemical composition of four tropical grassess. *J. Natl. Sci. Found. Sri Lanka* **1993**, 21, 189-194.
  32. Pequeno, D.N.L.; Pedreira, C.G.S.; Sollenberger, L.E.; de Faria, A.F.G.; Silva, L.S. Forage accumulation and nutritive value of *Brachiariagrasses* and Tifton 85 bermudagrass as affected by harvest frequency and irrigation. *Agron. J.* **2015**, 107, 1741-1749, doi:10.2134/agronj15.0115.
  33. Ondiko, C. N.; Njunie M. N.; Njarui D. M. G.; Auma E.; Ngode L. Effects of cutting frequency on forage production and nutritive value of *Brachiaria* grass cultivars in coastal lowlands of Kenya, Climate smart *Brachiaria* grasses for improving livestock production in East Africa: Kenya Experience: Proceedings of a workshop, Naivasha, Kenya, 14-15, Eds. Njarui, D.M.; Gichangi, E.M.; Ghimire, S.R.; Muinga, R.W.; Kenya Agricultural and Livestock Research Organization: Nairobi, Kenya, **2016**.
  34. Nyambati, E. M.; Ayako, W.; Chelimo, E. J.; Njarui, D. M. G. Production and nutritive quality of *Brachiaria* grass cultivars subjected to different cutting intervals in the cool sub-humid highlands of central Kenya, Climate smart *Brachiaria* grasses for improving livestock production in East Africa: Kenya Experience: Proceedings of a workshop, Naivasha, Kenya, 14-15, Eds. Njarui, D.M.; Gichangi, E.M.; Ghimire, S.R.; Muinga, R.W.; Kenya Agricultural and Livestock Research Organization: Nairobi, Kenya, **2016**.

35. Njarui, D. M. G.; Gatheru, M.; Ghimire, S. R.; Mureithi, J. G. Effects of seasons and cutting intervals on productivity and nutritive value of *Brachiaria* grass cultivars in semi-arid eastern Kenya, Climate smart *Brachiaria* grasses for improving livestock production in East Africa: Kenya Experience: Proceedings of a workshop, Naivasha, Kenya, 14-15, Eds. Njarui, D.M.; Gichangi, E.M.; Ghimire, S.R.; Muinga, R.W.; Kenya Agricultural and Livestock Research Organization: Nairobi, Kenya, **2016**.
